# Supplementary material
Source: publisher site journal article supplement (https://www.dovepress.com/article/368147)
Supplement: Supplementary file 1 [file get_supplementary_file.php]

**eTable 1: Unadjusted and stepwise adjusted results of the regression**

|  | OR unadjusted (95% CI) | OR adjusted for DRF (95% CI) | OR adjusted for DRF & gender (95% CI) | OR adjusted for DRF, gender & age (95% CI) | OR adjusted for DRF, gender, age & NMF before (95% CI) |
| --- | --- | --- | --- | --- | --- |
| PTSD |  |  |  |  |  |
| No | 1 | 1 | 1 | 1 | 1 |
| Yes | 2.52** (2.28 - 2.79) | 2.37** (2.13 - 2.64) | 2.37** (2.13 - 2.64) | 2.32** (2.09 - 2.59) | 2.11** (1.86 - 2.40) |
|  |  |  |  |  |  |
| Insomnia |  |  |  |  |  |
| no insomnia | 1 | 1 | 1 | 1 | 1 |
| threshold insomnia | 1.49** (1.32 - 1.71) | 1.54** (1.36 - 1.74) | 1.55** (1.37 - 1.75) | 1.51** (1.34 - 1.71) | 1.32** (1.14 - 1.53) |
| clinical insomnia | 1.58** (1.25 - 1.82) | 1.58** (1.32 - 1.89) | 1.59** (1.32 - 1.90) | 1.54** (1.28 - 1.84) | 1.12 (.90 - 1.38) |
| severe insomnia | 1.24 (.87 - 1.54) | 1.29 (.98 - 1.72) | 1.29 (.97 - 1.72) | 1.23 (.93 - 1.64) | .86 (.62 - 1.20) |
|  |  |  |  |  |  |
| Sleep quality |  |  |  |  |  |
| bad | 1.45** (1.30 - 1.62) | 1.45** (1.29 - 1.63) | 1.45** (1.29 - 1.63) | 1.52** (1.35 - 1.71) | 1.91** (1.67 - 2.20) |
| good | 1 | 1 | 1 | 1 | 1 |
|  |  |  |  |  |  |
| Stress |  |  |  |  |  |
| mild | 1 | 1 | 1 | 1 | 1 |
| severe | 1.14* (1.01 - 1.29) | 1.09 (.96 - 1.24) | 1.08 (.95 - 1.23) | 1.08 (.95 - 1.23) | 1.13 (.98 - 1.32) |
|  |  |  |  |  |  |
| Anxiety |  |  |  |  |  |
| No | 1 | 1 | 1 | 1 | 1 |
| Yes | 1.35** (1.18 - 1.55) | 1.44** (1.25 - 1.66) | 1.42** (1.23 - 1.64) | 1.39** (1.21 - 1.61) | 1.47** (1.24 - 1.73) |
|  |  |  |  |  |  |
| RBD |  |  |  |  |  |
| No | 1 | 1 | 1 | 1 | 1 |
| Yes | 1.59** (1.44 - 1.76) | 1.47** (1.32 - 1.63) | 1.47** (1.33 - 1.63) | 1.42** (1.28 - 1.57) | 1.25** (1.11 - 1.42) |
|  |  |  |  |  |  |
| OSA |  |  |  |  |  |
| Low risk | 1 | 1 | 1 | 1 | 1 |
| Elevated risk | 1.15* (1.03 - 1.28) | 1.17* (1.04 - 1.31) | 1.20* (1.07 - 1.35) | 1.34** (1.19 - 1.51) | 1.20* (1.11 - 1.42) |
|  |  |  |  |  |  |
| Depression |  |  |  |  |  |
| No | 1 | 1 | 1 | 1 | 1 |
| Yes | 1.18* (1.03 - 1.36) | 1.27* (1.09 - 1.47) | 1.27** (1.10 - 1.47) | 1.23* (1.06 - 1.42) | 1.21* (1.02 - 1.44) |
|  |  |  |  |  |  |
| Sleep talking |  |  |  |  |  |
| rare | 1 | 1 | 1 | 1 | 1 |
| frequent | 2.49** (2.11 - 2.93) | 1.82** (1.53 - 2.16) | 1.81** (1.53 - 2.15) | 1.79** (1.51 - 2.12) | 1.69** (1.38 - 2.06) |
|  |  |  |  |  |  |
| Sleep onset problems |  |  |  |  |  |
| rare | 1 | 1 | 1 | 1 | 1 |
| frequent | 1.14* (1.01 - 1.28) | 1.14* (1.01 - 1.29) | 1.13* (1.00 - 1.28) | 1.09 (.96 - 1.23) | 1.23* (1.07 - 1.42) |
|  |  |  |  |  |  |
| Problems staying asleep |  |  |  |  |  |
| rare | 1 | 1 | 1 | 1 | 1 |
| frequent | 1.34** (1.19 - 1.51) | 1.17* (1.03 - 1.32) | 1.16* (1.03 - 1.32) | 1.26** (1.12 - 1.43) | 1.14 (.98 - 1.32) |
|  |  |  |  |  |  |
| Early morning awakening |  |  |  |  |  |
| rare | 1 | 1 | 1 | 1 | 1 |
| frequent | 1.04 (.92 - 1.19) | 1.11 (.97 - 1.26) | 1.10 (.97 - 1.26) | 1.15* (1.01 - 1.32) | 1.24* (1.06 - 1.44) |
|  |  |  |  |  |  |
| Sleep medicine/hypnotics |  |  |  |  |  |
| Rare | 1 | 1 | 1 | 1 | 1 |
| Frequent | 1.24* (1.05 - 1.45) | 1.20* (1.01 - 1.43) | 1.21* (1.02 - 1.43) | 1.28* (1.08 - 1.52) | 1.07 (.87 - 1.32) |
|  |  |  |  |  |  |
| Daytime sleepiness |  |  |  |  |  |
| Rare | 1 | 1 | 1 | 1 | 1 |
| frequent | 1.06 (.95 - 1.19) | .99 (.88 - 1.12) | .99 (.88 - 1.12) | .98 (.87 - 1.11) | .97 (.84 - 1.12) |
|  |  |  |  |  |  |
| Fatigue |  |  |  |  |  |
| Rare | 1 | 1 | 1 | 1 | 1 |
| Frequent | 1.29** (1.15 - 1.45) | 1.16* (1.02 - 1.31) | 1.14* (1.01 - 1.29) | 1.12 (.99 - 1.27) | 1.21* (1.05 - 1.40) |
|  |  |  |  |  |  |
| Financial burden |  |  |  |  |  |
| Not at all | 1 | 1 | 1 | 1 | 1 |
| A little/somewhat | 1.15* (1.04 - 1.27) | 1.20* (1.08 - 1.34) | 1.21* (1.09 - 1.35) | 1.18* (1.06 - 1.31) | 1.16* (1.02 - 1.31) |
| Much/severely | 1.24* (1.08 - 1.43) | 1.31** (1.13 - 1.52) | 1.33** (1.15 - 1.54) | 1.28** (1.10 - 1.48) | 1.23* (1.03 - 1.46) |
|  |  |  |  |  |  |
| Restrictions |  |  |  |  |  |
| No | 1 | 1 | 1 | 1 | 1 |
| Two weeks or less | .84 ( .71 - 1.00) | .83* (.69 -.99) | .80* (.67 - .96) | .77* (.64 - .92) | .88 (.72 - 1.10) |
| 3 to 4 weeks | .90 (.72 - 1.13) | .85 (.67 - 1.08) | .83 (.65 - 1.05) | .79 (.62 - 1.00) | 1.03 (.79 - 1.36) |
| 5 to 6 weeks | 1.18 (.92 - 1.51) | 1.21 (.93 - 1.57) | 1.19 (.92 - 1.54) | 1.13 (.87 - 1.47) | 1.30 (.96 - 1.77) |
| 7 to 8 weeks | 1.21 (.98 - 1.50) | 1.16 (.93 - 1.44) | 1.12 (.90 - 1.40) | 1.09 (.87 - 1.35) | 1.23 (.95 - 1.59) |
| More than 8 weeks | 1.18* (1.05 - 1.34) | 1.17* (1.03 - 1.33) | 1.14* (1.00 - 1.30) | 1.11 (.98 - 1.26) | 1.42** (1.23 - 1.65) |
|  |  |  |  |  |  |
| COVID-19 |  |  |  |  |  |
| No | 1 | 1 | 1 | 1 | 1 |
| Yes | 1.33* (1.03 - 1.74) | 1.53* (1.16 - 2.02) | 1.54* (1.17 - 2.04) | 1.59** (1.20 - 2.10) | 1.48** (1.07 - 2.04) |
|  |  |  |  |  |  |
| Work situation |  |  |  |  |  |
| Student | 1.39** (1.23 - 1.58) | 1.27** (1.11 - 1.45) | 1.26** (1.10 - 1.44) | .92 (.79 - 1.07) | .83* (.70 - .99) |
| Reg. Daywork | 1 | 1 | 1 | 1 | 1 |
| Irreg. Daywork | 1.04 (.90 - 1.19) | 1.04 (.90 - 1.20) | 1.02 (.88 - 1.18) | 1.02 (.88 - 1.19) | 1.02 (.86 - 1.21) |
| Unemployed | 1.18 (1.00 - 1.39) | 1.10 (.93 - 1.31) | 1.09 (.92 - 1.30) | 1.11 (.93 - 1.32) | .99 (.81 - 1.22) |
| At home/no salary | 1.03 (.88 - 1.21) | 1.01 (.85 - 1.19) | .95 (.80 - 1.13) | 1.13 (.95 - 1.35) | 1.00 (.81 - 1.24) |
| Retired | .83* (.69 - 1.00) | .78* (.64 - .94) | .79* (.65 - .96) | 1.35* (1.08 - 1.68) | 1.12 (.87 - 1.45) |
|  |  |  |  |  |  |
| Living alone |  |  |  |  |  |
| yes | 1 | 1 | 1 | 1 | 1 |
| no | 1.02 (.76 - 1.35) | 1.09 (.81 - 1.47) | 1.10 (.82 - 1.48) | 1.07 (.79 - 1.44) | 1.07 (.75 - 1.52) |
|  |  |  |  |  |  |
| Quality of life (0-100) |  |  |  |  |  |
| 0-29 | 1.02 (.84 - 1.24) | 1.17 (.95 - 1.44) | 1.19 (.97 - 1.46) | 1.10 (.89 - 1.35) | .92 (.72 - 1.18) |
| 30-49 | .95 (.80 - 1.12) | 1.04 (.87 - 1.25) | 1.05 (.88 - 1.26) | .98 (.82 - 1.17) | 1.00 (.81 - 1.24) |
| 50-79 | 1.05 (.93 - 1.19) | 1.12 (.99 - 1.27) | 1.13 (1.00 - 1.28) | 1.09 (.96 - 1.23) | 1.07 (.92 - 1.24) |
| 80-100 | 1 | 1 | 1 | 1 | 1 |
|  |  |  |  |  |  |
| Quality of health |  |  |  |  |  |
| 0-29 | 1.27* (1.03 - 1.56) | 1.37* (1.10 - 1.70) | 1.37* (1.10 - 1.71) | 1.41* (1.13 - 1.75) | 1.19 (.91 - 1.55) |
| 30-49 | 1.12 (.95 - 1.32) | 1.12 (.94 - 1.34) | 1.12 (.94 - 1.34) | 1.16 (.97 - 1.39) | 1.06 (.86 - 1.31) |
| 50-79 | 1.04 (.93 - 1.15) | 1.05 (.94 - 1.17) | 1.05 (.94 - 1.18) | 1.09 (.97 - 1.22) | 1.05 (.92 - 1.20) |
| 80-100 | 1 | 1 | 1 | 1 | 1 |
|  |  |  |  |  |  |
| Wellbeing |  |  |  |  |  |
| 0-24 | 1.46** (1.21 - 1.78) | 1.41** (1.15 - 1.73) | 1.40** (1.14 - 1.71) | 1.41** (1.15 - 1.73) | 1.49** (1.17 - 1.90) |
| 25-49 | 1.46** (1.24 - 1.72) | 1.39** (1.17 - 1.65) | 1.37** (1.15 - 1.62) | 1.35** (1.14 - 1.61) | 1.35* (1.10 - 1.66) |
| 50-74 | 1.47** (1.27 - 1.70) | 1.43** (1.22 - 1.66) | 1.41** (1.21 - 1.65) | 1.40** (1.20 - 1.63) | 1.36** (1.14 - 1.63) |
| 75-100 | 1 | 1 | 1 |  | 1 |
|  |  |  |  |  |  |
| DRF |  |  |  |  |  |
| Low |  | 1 | 1 | 1 | 1 |
| High |  | 4.81** (4.38 - 5.28) | 4.78** (4.35 - 5.25) | 4.77** (4.34 - 5.25) | 4.03** (3.61 - 4.50) |
|  |  |  |  |  |  |
| Gender |  |  |  |  |  |
| Female |  |  | 1.18* (1.06 - 1.31) | 1.18* (1.05 - 1.31) | 1.26** (1.11 - 1.43) |
| Male |  |  | 1 | 1 |  |
|  |  |  |  |  |  |
| Age |  |  |  | .98** (.97 - .98) | .99** (.98 - .99) |
|  |  |  |  |  |  |
| NMF before |  |  |  |  |  |
| Low |  |  |  |  | 1 |
| High |  |  |  |  | 32.11** (27.47 - 37.52) |

Note*:* *: p≤0.05; **: p≤0.001 .
